# Supplementary material
Source: Springer Nature journal article supplement (https://www.springermedizin.de/resource/supplementary/12981_2011_200_MOESM1_ESM.pdf/9604034)
Supplement: MOESM1 [file 9604034]

HIV+ adults seen at MRC HIV clinic between June 2004 and September 2009: **2,645**

**2191 (83%)**  
HIV-1 infected

**347 (13%)** HIV-2  
infected

**107 (4%)** HIV-1+2  
infected

Not ART-  
eligible:  
**1544**

ART-  
eligible:  
**647**

Not ART-  
eligible:  
**244**

ART-  
eligible:  
**103**

Not ART-  
eligible:  
**67**

ART-  
eligible:  
**40**

No ART:  
**228**

On ART:  
**419**

No ART:  
**37**

On ART:  
**66**

No ART:  
**15**

On ART:  
**25**
